# Supplementary material
Source: Springer Nature journal article supplement (https://www.springermedizin.de/resource/supplementary/12875_2007_315_MOESM3_ESM.pdf/9436738)

— R E H A B I L I T A T I O N —>

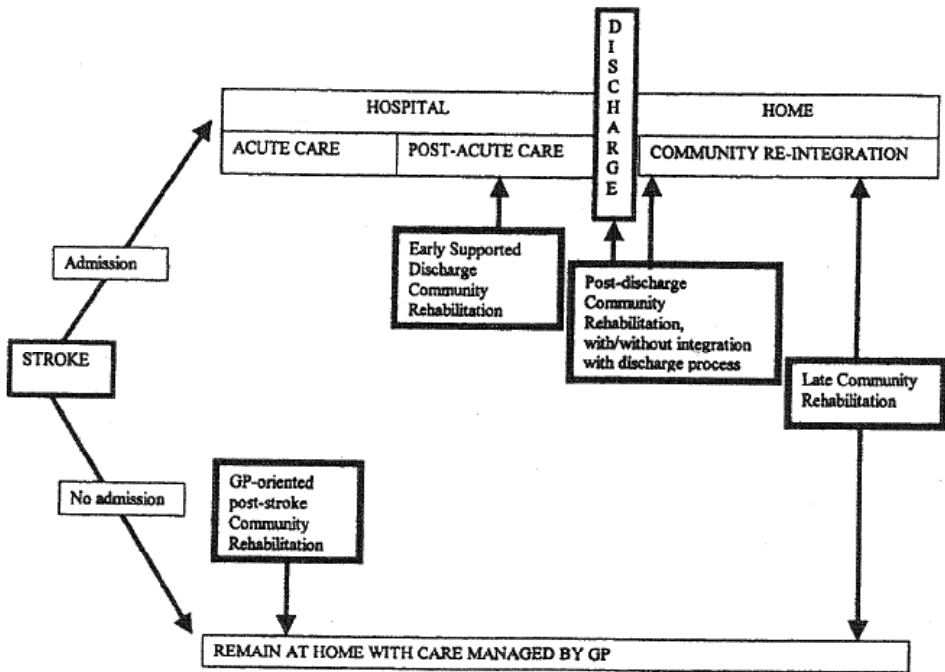

Supplement: MOESM3 [file 9436738]
